# Supplementary material for: A double bilayer to study the nonequilibrium environmental response of GIRK2 in complex states
Source: Royal Society of Chemistry journal article supplement (doi:10.1039/d1cp01785c), 2021-01-01
Supplement: d1cp01785c2.pdf [file d1cp01785c2.pdf]

## Supplementary Information

# Double bilayer to study nonequilibrium environmental response of GIRK2 in complex states

\*Corresponding author:

Chenyi Liao ([cliao2@dicp.ac.cn](mailto:cliao2@dicp.ac.cn)); Guohui Li ([ghli@dicp.ac.cn](mailto:ghli@dicp.ac.cn))

**Table S1. A summary of simulations.**

|                                                               | No. of atoms | Box size (nm <sup>3</sup> ) | MD Simulation (ns)     | Umbrella sampling (ns) |
|---------------------------------------------------------------|--------------|-----------------------------|------------------------|------------------------|
| Single bilayer systems                                        |              |                             |                        |                        |
| random PIP2                                                   | 220186       | 123×123×157                 | 1374, 1017, 1089, 1017 | 100, 100, 100          |
| PIP2-bound GIRK2                                              | 220478       | 123×123×157                 | 1007, 1096, 1031, 1071 | 100, 100, 100          |
| Gβγ-bound GIRK2                                               | 544377       | 180×180×178                 | 1120, 1190, 1180, 1440 | 100, 100, 100          |
| Double bilayer systems                                        |              |                             |                        |                        |
| PIP2-bound GIRK2                                              | 440952       | 115×115×325                 | 2606, 1185, 2051       | 100, 100, 100          |
| Gβγ-bound GIRK2 for inward K <sup>+</sup>                     | 1088754      | 170×170×370                 | 1876, 1986, 3358       | 100, 100, 100          |
| Gβγ-bound GIRK2 for outward K <sup>+</sup>                    | 1088754      | 170×170×370                 | 1425, 1455             |                        |
| Gβγ-bound GIRK2 for inward K <sup>+</sup> and Na <sup>+</sup> | 1088754      | 170×170×370                 | 1110, 1324             |                        |

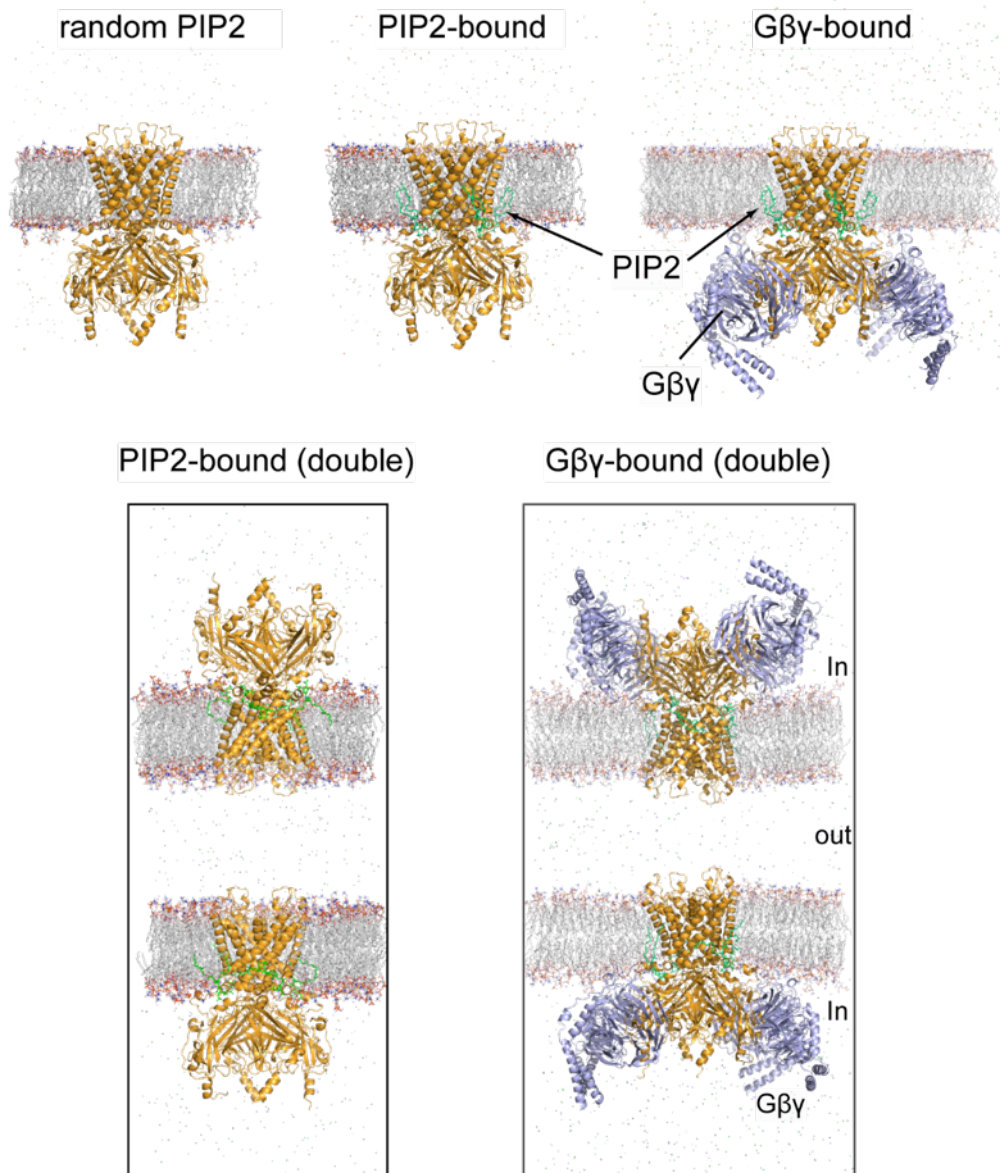

**Fig. S1 Five systems in current study:** random PIP<sub>2</sub>, PIP<sub>2</sub>-bound, and Gβγ-bound states in single bilayer; PIP<sub>2</sub>-bound and Gβγ-bound states in double bilayer. GIRK2 is shown in orange cartoon; Gβγ is shown in light blue cartoon; bound-PIP<sub>2</sub> is shown in green stick.

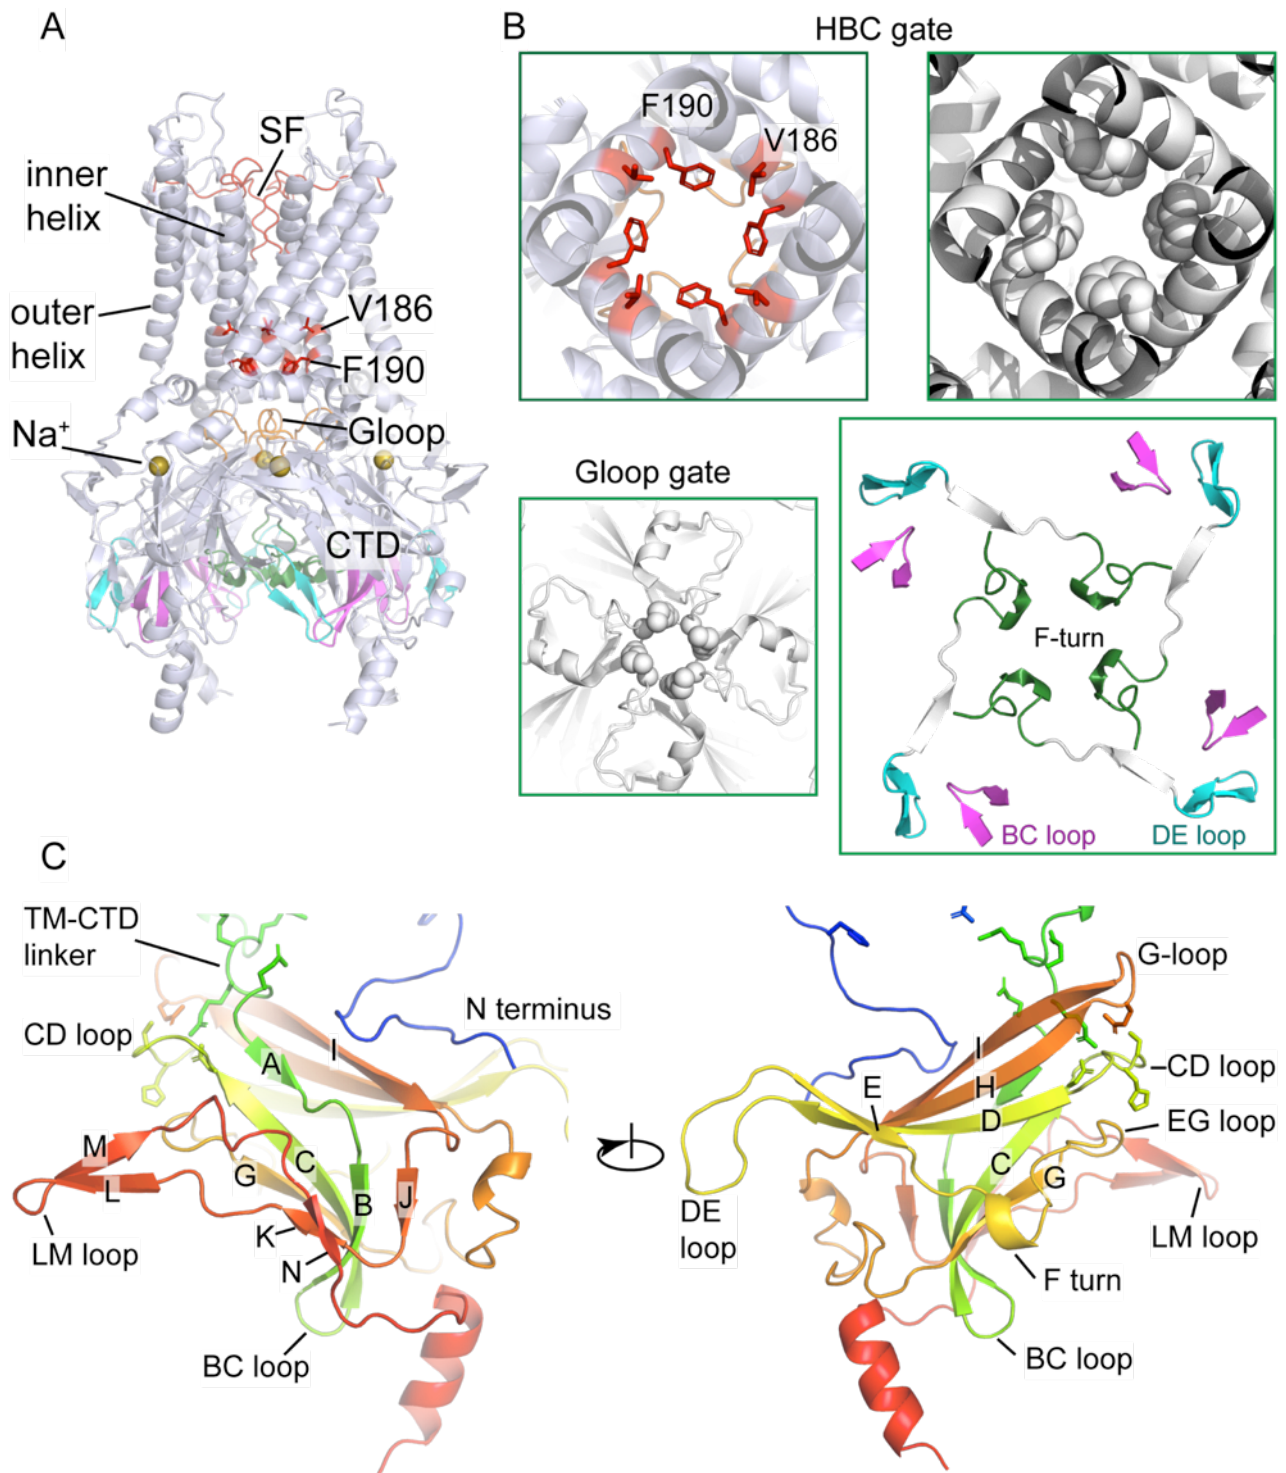

**Fig. S2 GIRK2 structure.** (A) Side view of GIRK2 with the inner and outer helix consisting the transmembrane helices (TMs) domain; (B) top-down views of the HBC gate comprising V186 and F190, the G-loop gate (M311-M317), DE loop (in res. 245-253), BC loop (in res. 212-219), and F-turn (in res. 262-272) in CTD; (C) side views of CTD in one GIRK2 subunit with  $\beta$ -strands and loops labeled.

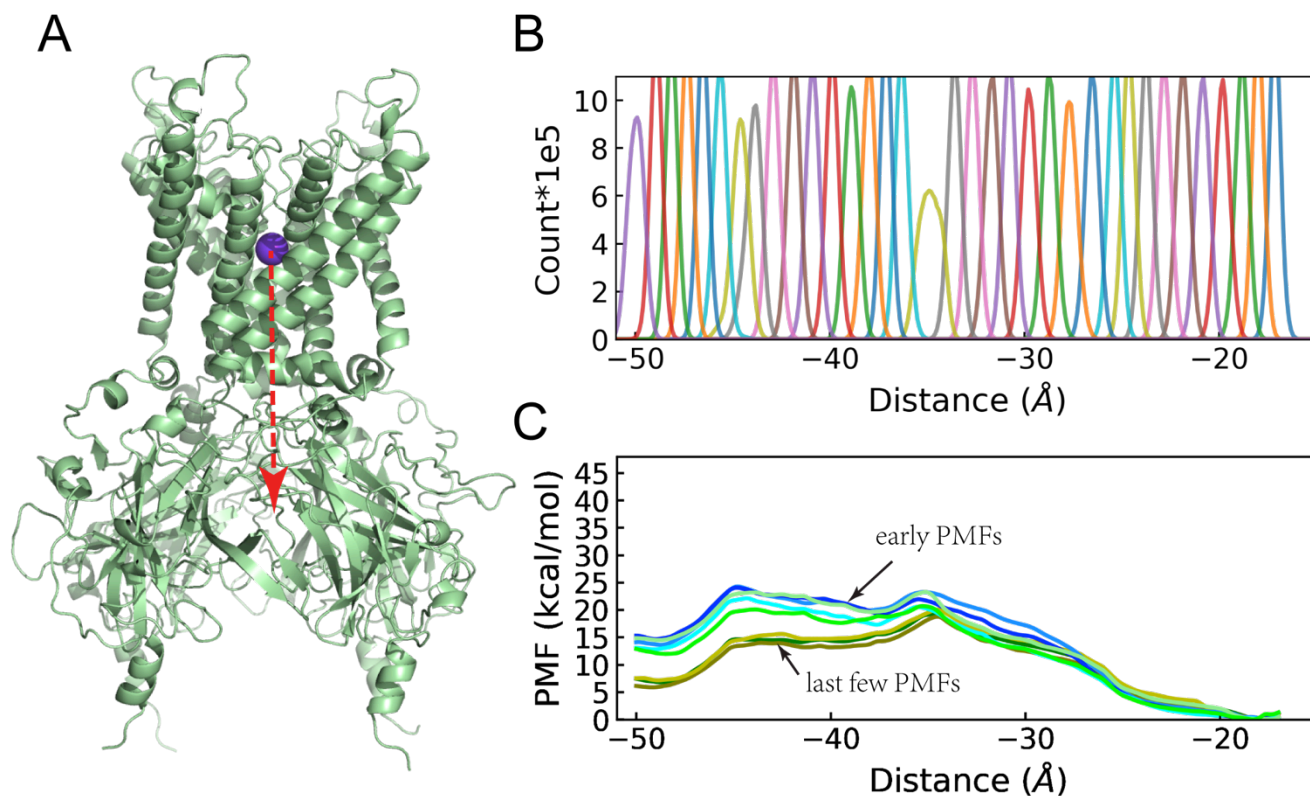

**Fig. S3 Umbrella sampling scheme for K<sup>+</sup> PMF calculation.** (A) Demonstration of a K<sup>+</sup> pulled along the GIRK2 channel to generate trajectory for initial umbrella sampling windows. (B) Histogram of z-position distributions of K<sup>+</sup> along the channel from 34 windows to show the overlap between adjacent windows. (C) Illustration of PMFs in 10-ns interval in 100 ns constrained MD simulation to check if the PMF calculation was converged. The last three lines in dark green or olive indicated the convergence.

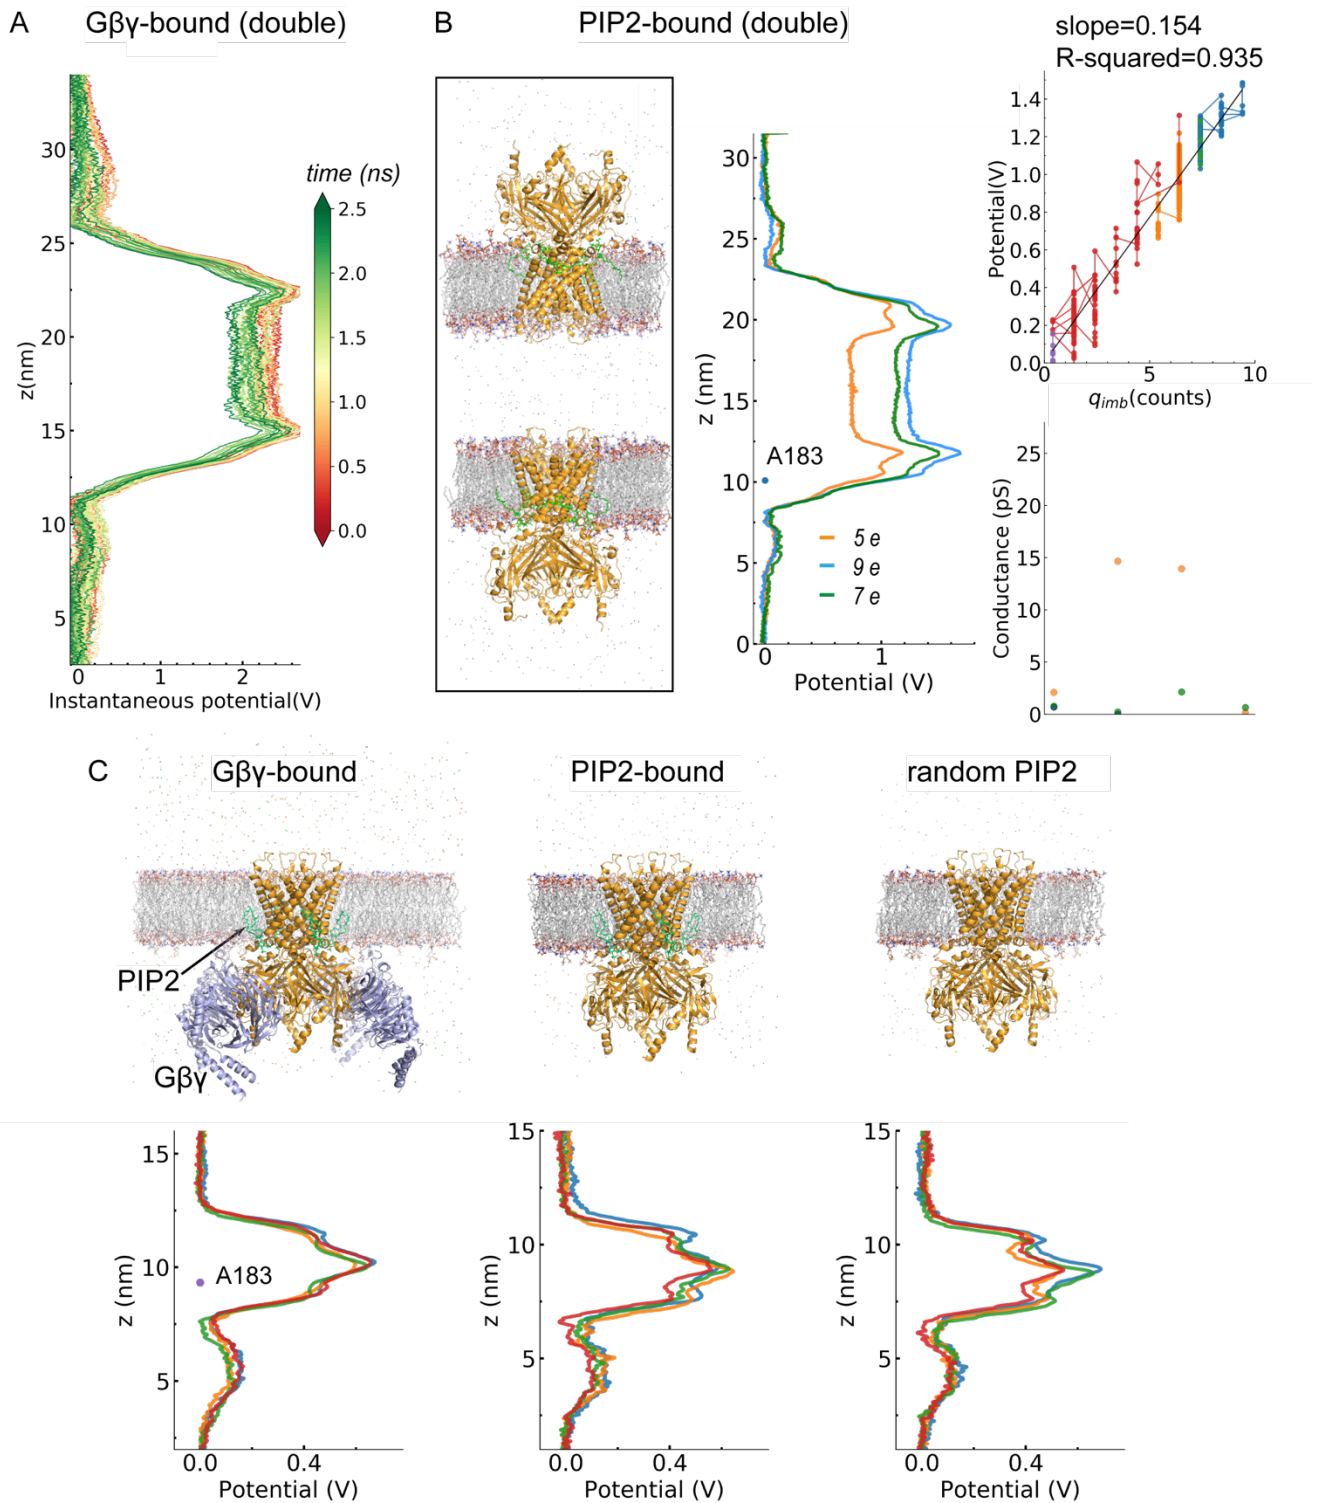

**Fig. S4 Electric potentials.** (A) Instantaneous electric potentials in the initial 2.48 ns comprising 31 frames (indicated by color bar) in Gβγ-bound double bilayer system. (B) PIP<sub>2</sub>-bound double bilayer system and final electric potentials along the z-axis from three independent simulations; relationship between membrane potential and charge imbalance as  $U=0.154 \times q_{imb}$ ; ion conductance values corresponding to each discharge process in Fig 2D. (C) Single bilayer systems of Gβγ-bound, PIP<sub>2</sub>-bound, and random PIP<sub>2</sub> systems and final

electric potentials along the z-axis from four independent simulations. A183 was labeled as a position marker.

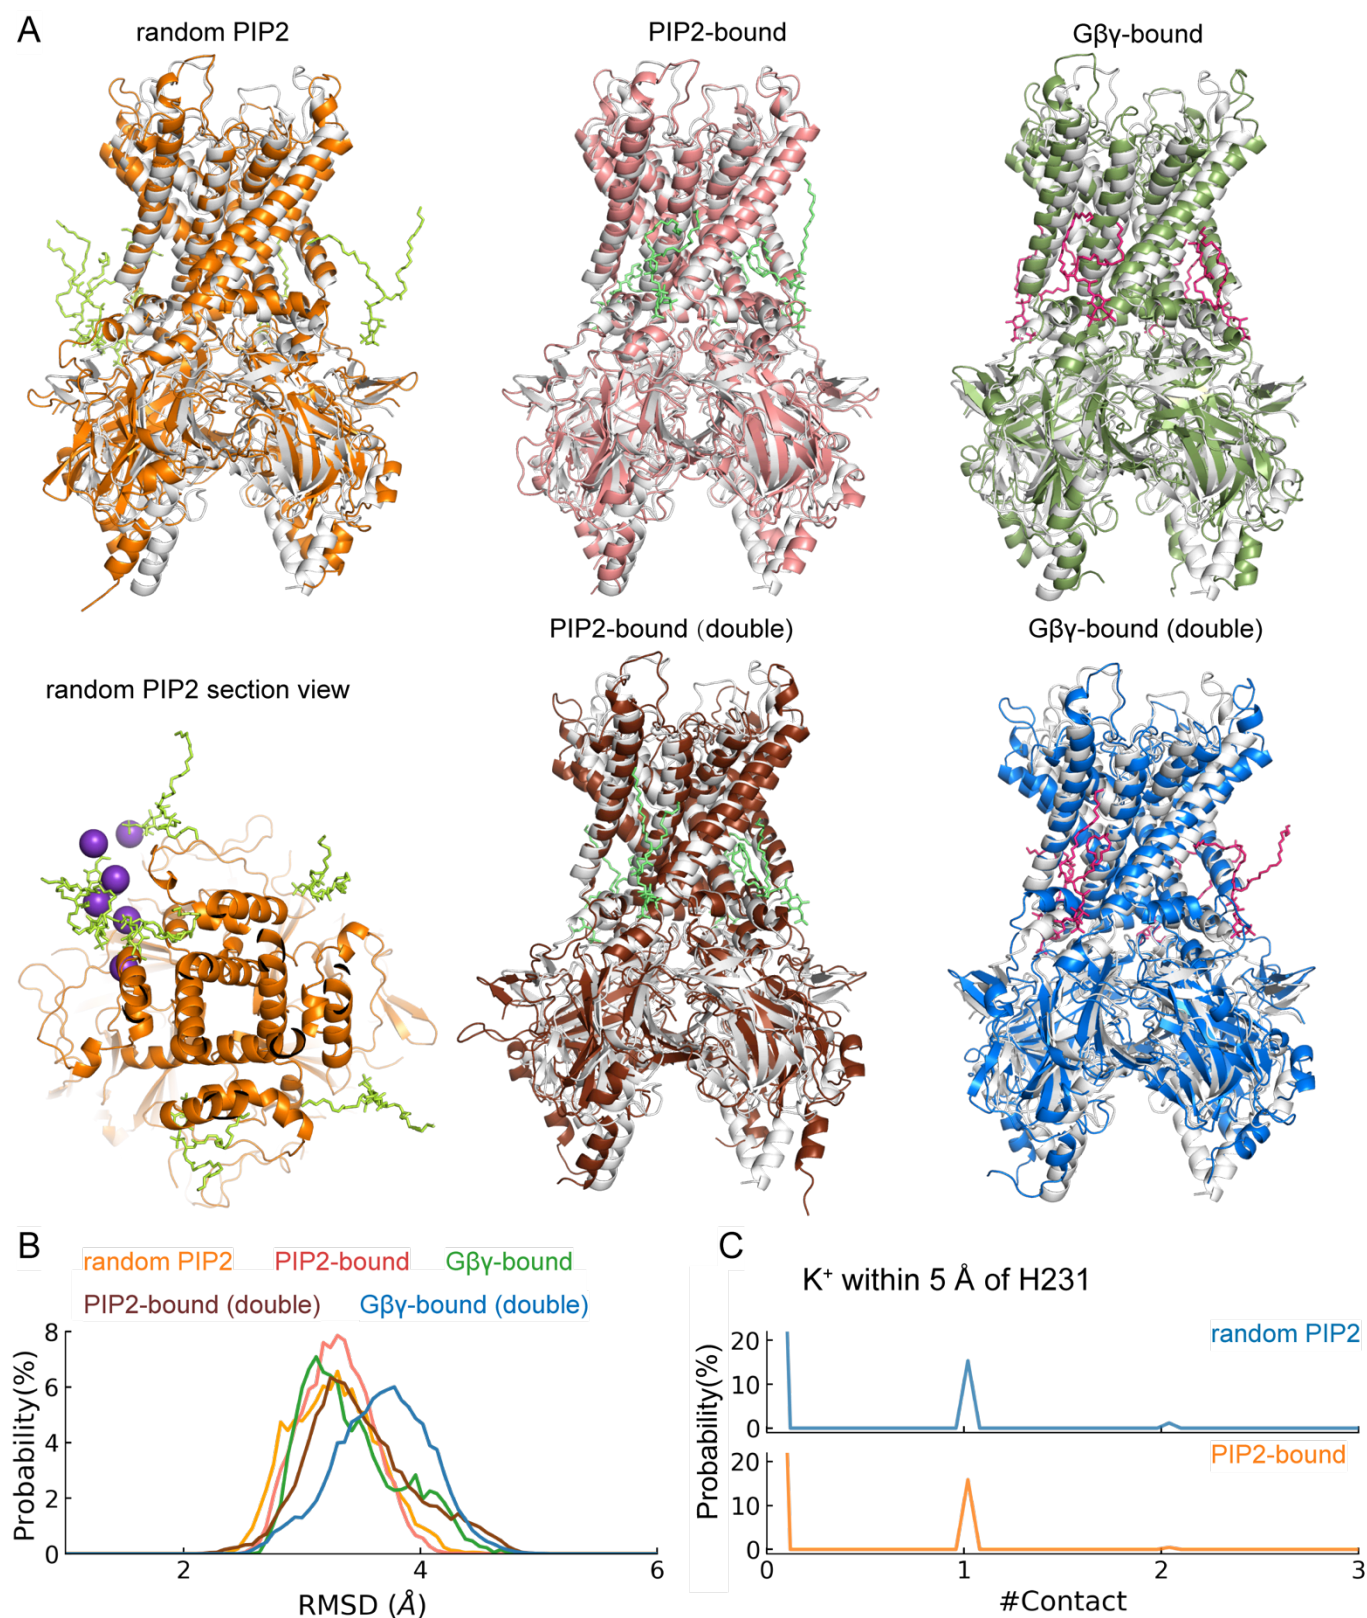

**Fig. S5 Structural alignments and interactions with PIP<sub>2</sub> and cations.** (A) Structural alignments on crystal structure (PDBID: 4KFM) for representatives of GIRK2 in random PIP<sub>2</sub>, PIP<sub>2</sub>-bound, Gβγ-bound

single bilayer systems, PIP<sub>2</sub>-bound and Gβγ-bound double bilayer systems. PIP<sub>2</sub> molecules are shown in light green or pink sticks. In random PIP<sub>2</sub> system, eventually 4~7 PIP<sub>2</sub> molecules were found gathering around GIRK2 and formed hydrogen bonds particularly with R58 and K62 of GIRK2. A section view of random PIP<sub>2</sub> system is shown with bound PIP<sub>2</sub> molecules and K<sup>+</sup>-bridged PIP<sub>2</sub> clusters shown in sticks. K<sup>+</sup> within 4 Å of PIP<sub>2</sub> are shown in purple sphere. (B) Cα RMSD distribution histograms of GIRK2 in random PIP<sub>2</sub>, PIP<sub>2</sub>-bound, Gβγ-bound single bilayer systems, PIP<sub>2</sub>-bound and Gβγ-bound double bilayer systems for inward rectification of K<sup>+</sup>. First frame was used as the reference. (C) Distribution histograms of number of K<sup>+</sup> within 5 Å of H231 in random PIP<sub>2</sub> and PIP<sub>2</sub>-bound systems without Na<sup>+</sup> ingredient.

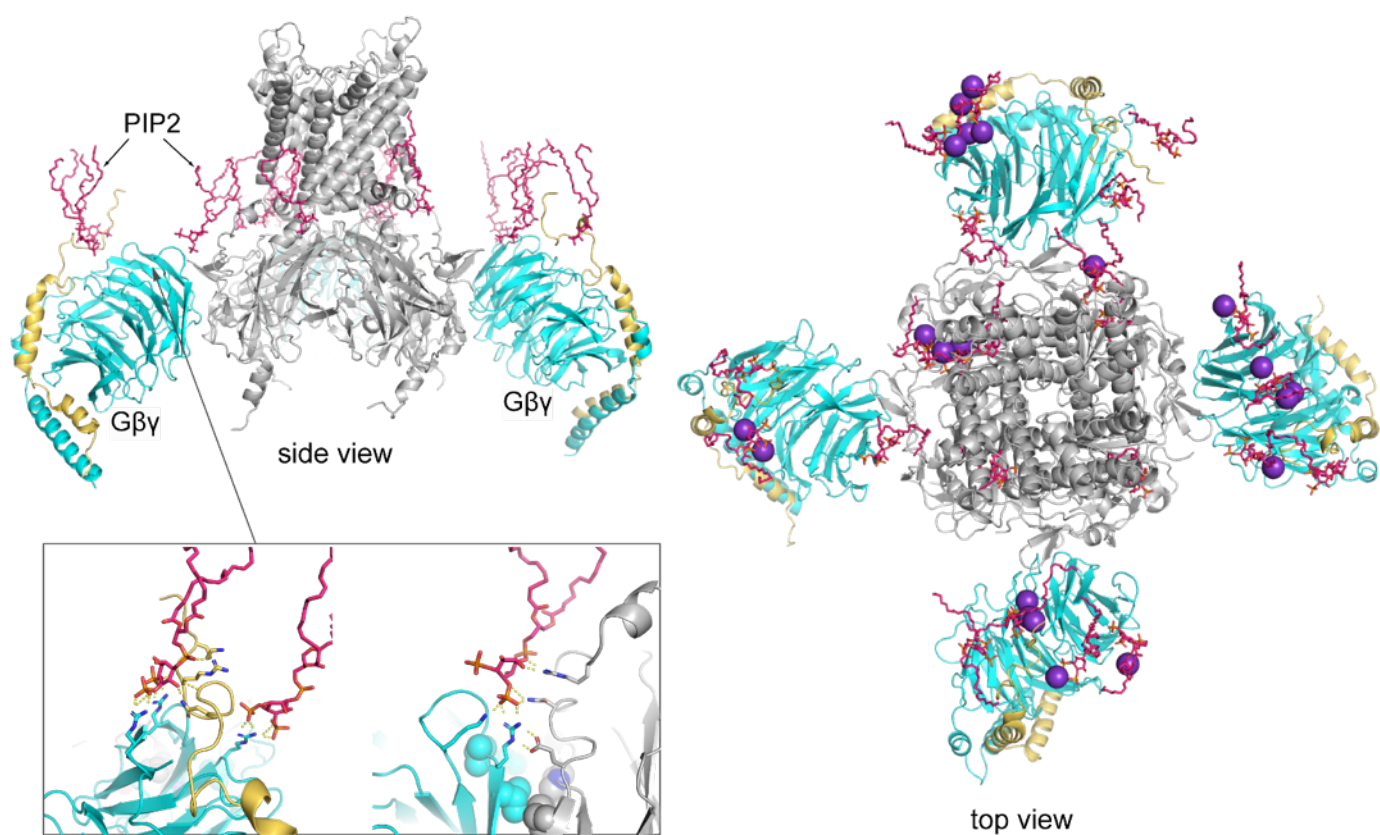

**Fig. S6** A final snapshot of Gβγ-bound GIRK2, where PIP<sub>2</sub> molecules (in pink) aggregate and interact with GIRK2 (in gray) and Gβγ (in cyan and yellow). K<sup>+</sup> within 4 Å of PIP<sub>2</sub> are shown in purple sphere in top view. PIP<sub>2</sub> molecule and K<sup>+</sup>-bridged PIP<sub>2</sub> clusters not only interact with GIRK2 but also formed strong interactions with Gβγ.

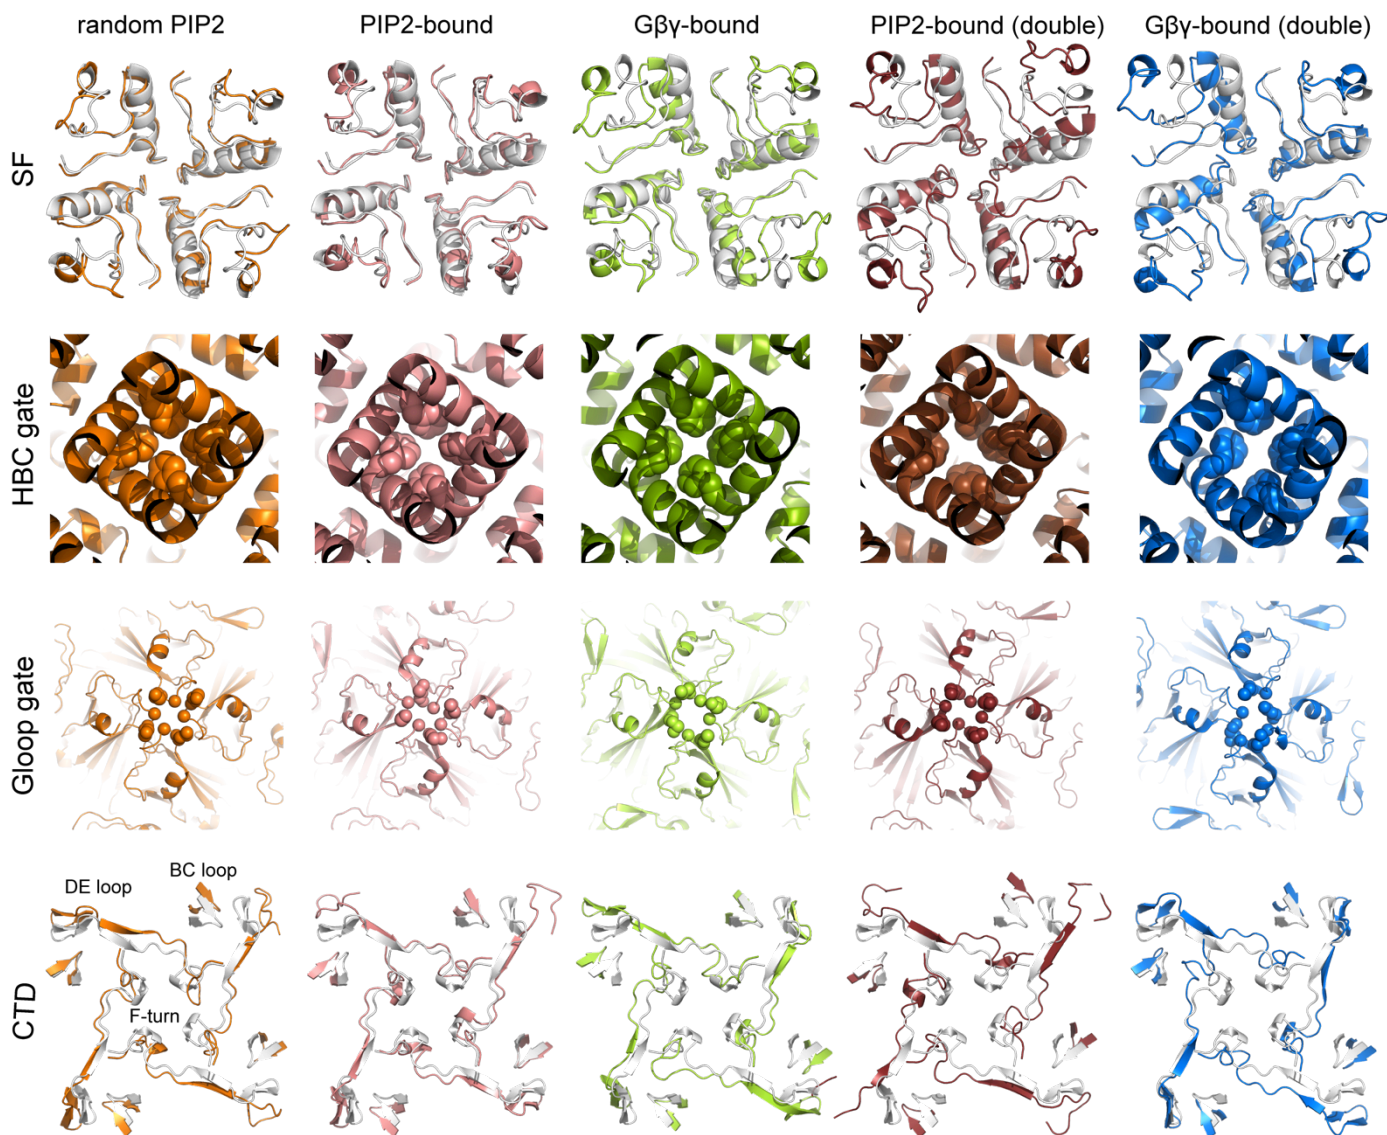

**Fig. S7 Top-down views of different sections** of representative GIRK2 structures (after structural clustering) in random PIP<sub>2</sub>, PIP<sub>2</sub>-bound, Gβγ-bound single bilayer systems, PIP<sub>2</sub>-bound and Gβγ-bound double bilayer systems after alignments on the crystal structure (PDBID: 4KFM): the selectivity filter (SF), HBC gate with F190 shown in sphere, G-loop gate with G316 and M317 shown in sphere, and the DE loop (in res. 245-253), BC loop (in res. 212-219), and F-turn (in res. 262-272) in CTD.

### The HBC and G-loop distances in nonequilibrium condition

The HBC and G-loop Cα distances and minimum distance are commonly used to indicate the opening of GIRKs. However, the distances range exhibited flexible and varied in previous GIRK2 studies<sup>1-3</sup>. In our multiple microsecond MD simulations of single bilayer systems, the F190 Cα distances of HBC were roughly 11~15 Å in random PIP<sub>2</sub>, while there was 1~2 Å increasement in PIP<sub>2</sub>-bound and Gβγ-bound (Fig S8). The minimum distances of HBC, M311-M317 Cα distances of G-loop, and minimum distances of



G-loop were largely overlapped at 4~6 Å, 14~18 Å, and 5~8 Å respectively in random PIP<sub>2</sub>, PIP<sub>2</sub>-bound and Gβγ-bound. In response to membrane potential, the HBC and G-loop distances range in PIP<sub>2</sub>-bound and Gβγ-bound double bilayer system were generally extended by 2 Å. The distributions of TM2 tilt angle and TM2-CTD dihedral angles were largely overlapped in all systems (Fig S9) comparing with the differentiable distributions in a GIRK2 simulation study <sup>2</sup>.

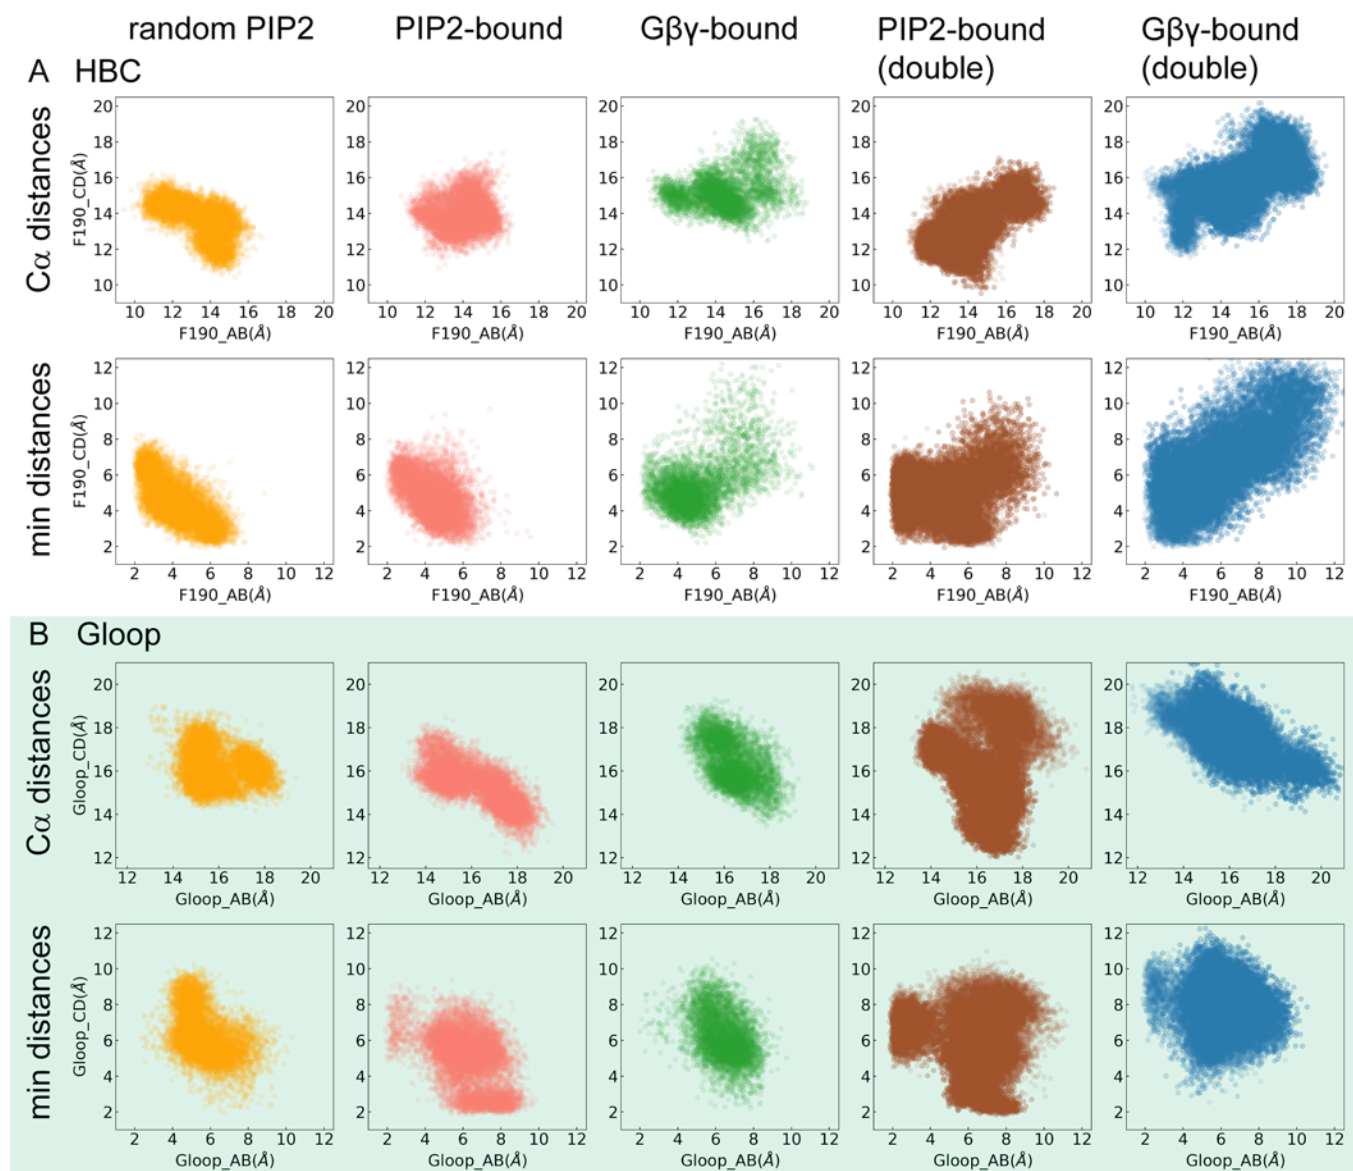

**Fig. S8 GIRK2 HBC and G-loop minimum or Ca pair distance distributions** in random PIP<sub>2</sub>, PIP<sub>2</sub>-bound, Gβγ-bound single bilayer systems, PIP<sub>2</sub>-bound and Gβγ-bound double bilayer systems. The general stable range of HBC Ca distance were around 11~15 Å in random PIP<sub>2</sub>, 11~16 Å in PIP<sub>2</sub>-bound and Gβγ-bound system. The general stable range of HBC minimum distance were around 4~6 Å in random PIP<sub>2</sub>, PIP<sub>2</sub>-bound and Gβγ-bound single bilayer systems. The general stable range of G-loop Ca distance were in 14~18 Å. The general stable range G-loop minimum distance were in 5~8 Å.

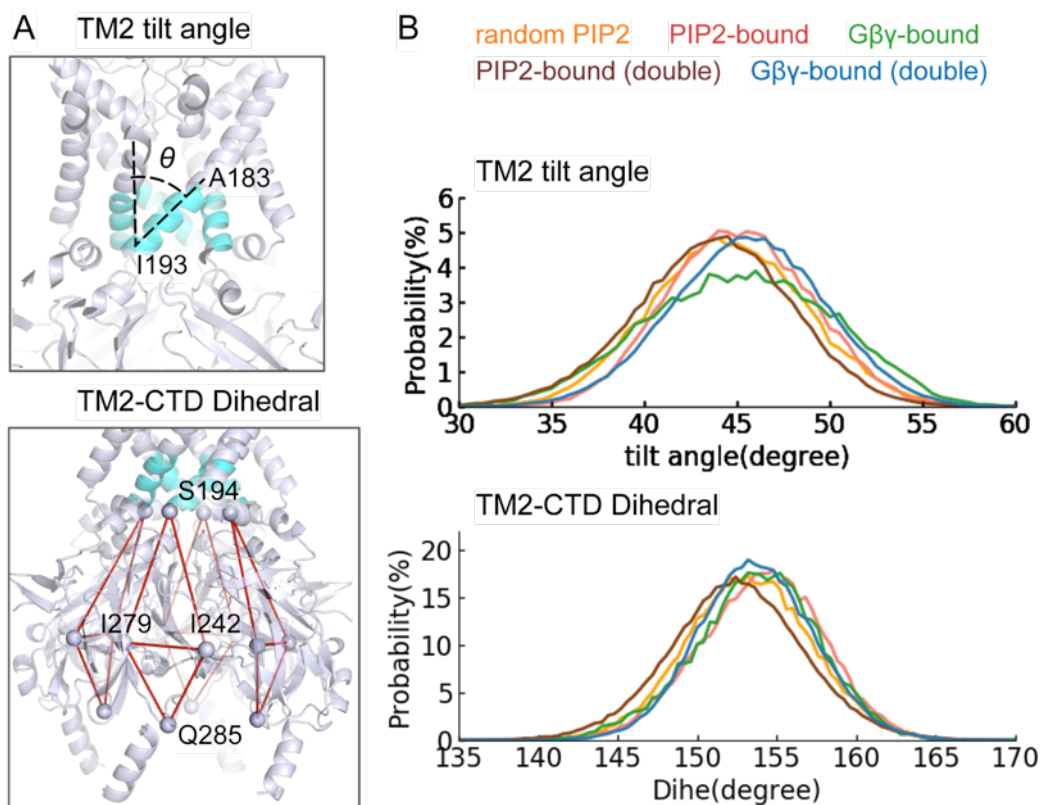

**Fig. S9 TM2 tilt angle and TM2-CTD dihedral angles of GIRK2.** (A) The TM2 tilt angle defined as the angle between the collection of N-HN vectors and z axis in res. 183-193; the TM2-CTD dihedral angle defined as dihedrals in the alpha carbons of res. S194-I242-I279-Q285. (B) TM2 tilt angle distribution histograms. They are largely overlapped in range of 38~52 degree. (C) TM2-CTD dihedral angle distribution histograms. They are largely overlapped in range of 146~158 degree.

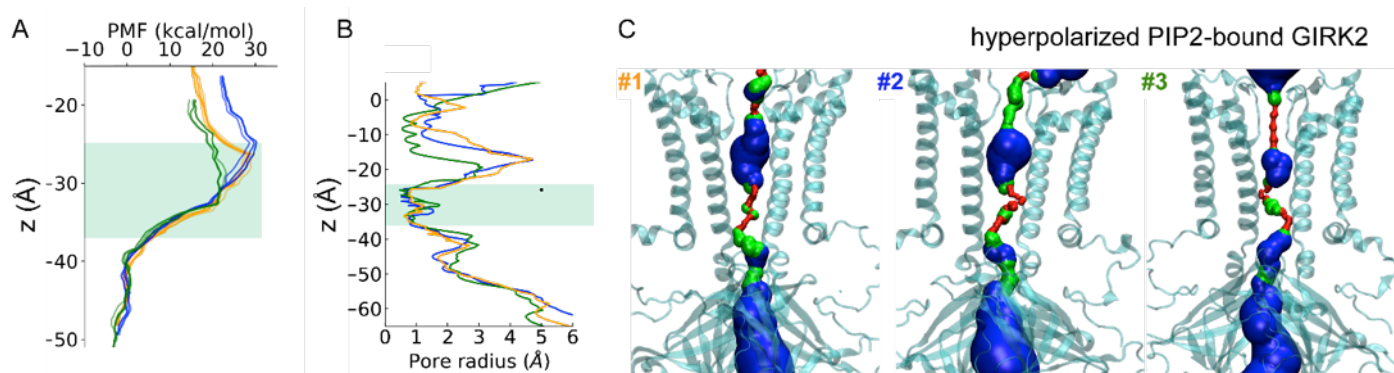

**Fig. S10 Free energy landscapes and pore radius along GIRK2 channel in PIP<sub>2</sub>-bound double bilayer.** US#1 and #2 were under membrane potential of -1.2 V, US #3 was under membrane potential of -0.68 V. (A) PMFs of a K<sup>+</sup> along the channel starting beneath the SF. Each system displayed with three groups (in orange, blue, and green) of PMFs and solvent-accessible pore radius along the channel in (B) 2D graph and (C) 3D surface representations. The HBC gate is indicated in light green stripe background in (A) and (B).

## Maximum conductance estimation from umbrella sampling

According to the PMF calculations, the rate-limiting region consists of the HBC and G-loop gate (~25 Å). Observed from trajectories, only one cation ( $K^+$  or  $Na^+$ ) occupy this region at a time. Thus, the rate-limiting region meet the single-ion conductance. In case of low conductance and slow ion motion through the channel, a diffusion model<sup>4</sup> had been used to calculate the crossing rate of ions in terms of one dimensional (1D) position-dependent diffusion coefficient  $D(z)$  and a 1D free energy surface  $W(z)$ . The ion flux ( $J$ ) through a unit area of the channel can be determined from the 1D Nernst-Planck equation<sup>4-6</sup>

$$J = -D(z) \left( \frac{dP(z)}{dz} - \frac{P(z)}{k_B T} \frac{dW(z)}{dz} \right), \quad (1)$$

where  $k_B$  is Boltzmann's constant and  $T$  is the absolute temperature. Both the diffusion coefficient  $D(z)$  and energy term  $W(z)$  are functions of the ion position along the  $z$  axis.  $P(z)$  is the ion probability density. At lower voltages (comparable to the cell membrane potential), the maximum single-ion conductance  $g_{max}$  is given by<sup>6,7</sup>

$$g_{max} = \frac{q^2}{k_B T L^2} \frac{1}{\langle e^{\frac{w(z)}{RT}} \rangle} \frac{1}{\langle e^{-\frac{w(z)}{RT}} \rangle} \frac{1}{\langle D(z) \rangle}, \quad (2)$$

where  $q$  is the quantity of charge an ion carries in coulomb,  $q = -1.602e^{-19}$  coulomb here;  $R$  is the gas constant 1.987 cal/mol/K; the length  $L$  correspond to the region of the channel that represents the rate limiting step for permeation,  $L = 25$  Å here. The brackets denote an average over  $L$  in the rate-limiting region. We ignore the energy contribution from local molecular interactions and interactions of atomic charges under intrinsic transmembrane potential or external voltage<sup>8</sup>, thus  $w(z)$  were directly obtained from PMF calculation in kcal/mol.

**Diffusion Coefficients.** The position-dependent diffusion coefficient  $D(z)$  was estimated using the Hummer positional autocorrelation extension of the Woolf-Roux estimator<sup>9,10</sup>:

$$D(z = \langle z \rangle) = \frac{\text{var}(z)}{\int_0^\infty \frac{C_z(t) dt}{\text{var}(z)}} = \frac{[\text{var}(z)]^2}{\int_0^\infty C_z(t) dt}, \quad (3)$$

where  $\langle z \rangle$  is the average of the reaction coordinate  $z$  in the biased run;  $\text{var}(z) = \langle z^2 \rangle - \langle z \rangle^2$  is its variance;  $\frac{\int_0^\infty C_z(t) dt}{\text{var}(z)}$  is the characteristic time of its autocorrelation function (ACF). Position ACF is calculated by

$$C_z(t) = \langle \delta z(0) \delta z(t) \rangle = \frac{1}{n_{\text{sample}}} \sum_{i=0}^{n_{\text{sample}}} \delta z(i) \delta z(t + i), \quad (4)$$

where  $\delta z(t) = z(t) - \langle z \rangle$ . The ACF\_parse.cpp script adapted from the Rowley Lab<sup>11, 12</sup> was used to work with the z-position outputs from US. For each window we calculated ten ACF plots from ten 1-ns periods of a 10-ns length of data, from which we checked if an ACF plot decays to zero. The diffusion profiles along the ion channel are shown in Fig S11, where the rate-limiting region are between -25 and -50 Å corresponding to HBC and G-loop region in the PMFs in Fig 3A. By comparing Fig S11 and Fig 3A, the HBC gate (around -30 Å) that shows small local  $D(z)$  value tends to exhibit higher free energy barrier. For example, several US simulations in random PIP<sub>2</sub> system and PIP<sub>2</sub>-bound system show small  $D(z)$  around  $0.5 \times 10^{-5}$  cm<sup>2</sup>/s at -30 Å, while Gβγ-bound systems show larger  $D(z)$  above  $1 \times 10^{-5}$  cm<sup>2</sup>/s.

Based on Eq. 2, we have the diffusion coefficients  $D(z)$  and PMF profile  $w(z)$  to calculate the maximum conductance for Gβγ-bound, PIP<sub>2</sub>-bound, and random PIP<sub>2</sub> single bilayer systems, which have no membrane potential difference. Double bilayer systems under higher potential difference were also calculated for comparison, although Eq. 2 was reduced for lower membrane potential comparable to cell membrane potential. The estimations from three US simulations are displayed in Table S2 for each system. By taking the maximum  $g_{\max}$  value for each system, we have 0.04 pS, 0.88 pS, and 123 pS for random PIP<sub>2</sub>, PIP<sub>2</sub>-bound, and Gβγ-bound single bilayer systems respectively, and  $4.7 \pm 10^{-14}$  pS and 47 pS for PIP<sub>2</sub>-bound and Gβγ-bound double bilayer systems respectively. In comparison with  $g$  from our MD simulations,  $g_{\max}$  by Eq. 2 underestimate the conductance in PIP<sub>2</sub>-bound system, and overestimate conductance in Gβγ-bound single bilayer system, although the  $g_{\max}$  for Gβγ-bound double bilayer is close to  $19.6 \pm 10.6$  pS from our MD simulations.

Table S2 Maximum conductance (pS) estimation from umbrella sampling.

| US No. | random PIP <sub>2</sub> | PIP <sub>2</sub> -bound | Gβγ-bound | PIP <sub>2</sub> -bound (double) | Gβγ-bound (double) |
|--------|-------------------------|-------------------------|-----------|----------------------------------|--------------------|
| #1     | 7.3E-05                 | 0.02                    | 123.3     | 4.4E-14                          | 41.4               |
| #2     | 2.2E-06                 | 0.14                    | 0.59      | 4.5E-18                          | 0.14               |
| #3     | 0.04                    | 0.88                    | 23.9      | 4.7E-14                          | 47.4               |

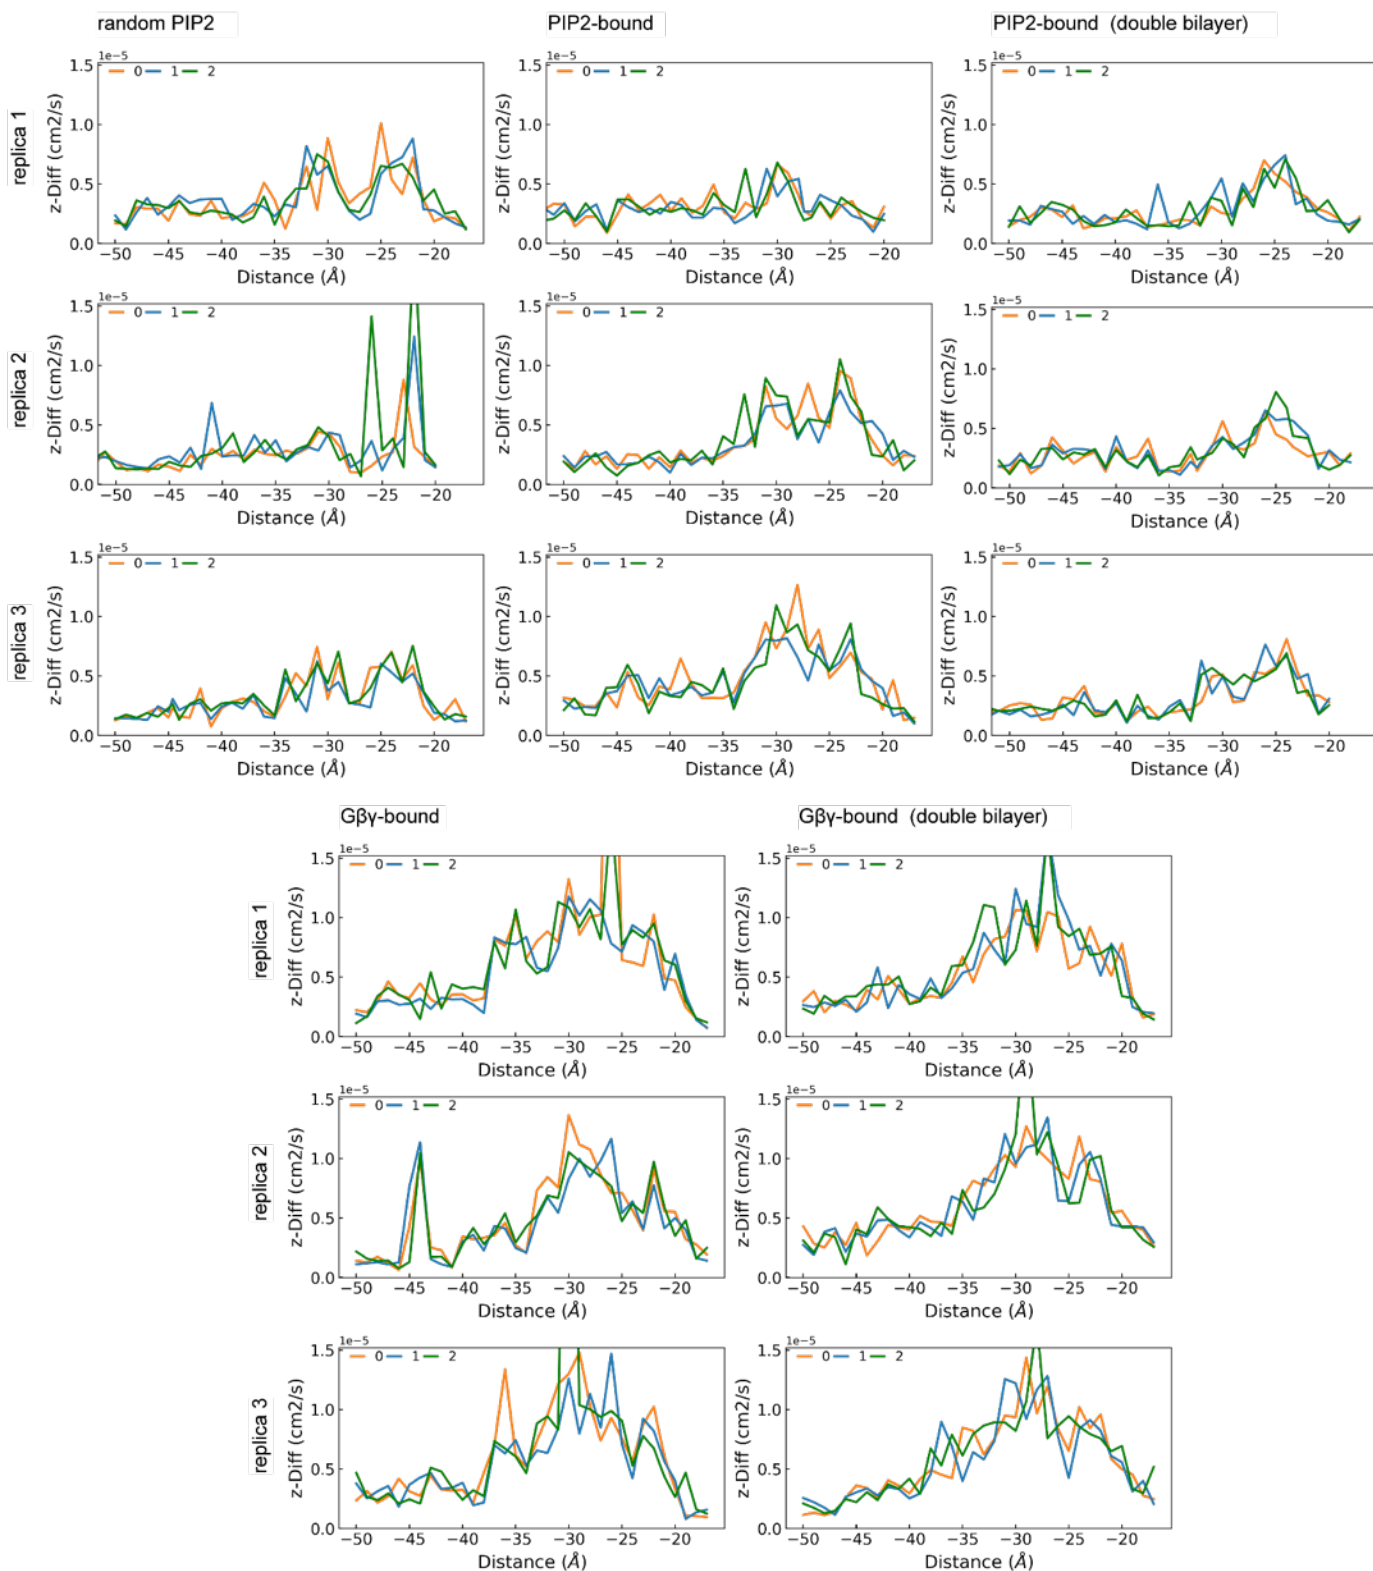

**Fig. S11 Diffusion profiles along the channel in random PIP<sub>2</sub>, PIP<sub>2</sub>-bound, Gβγ-bound single bilayer systems, PIP<sub>2</sub>-bound and Gβγ-bound double bilayer systems.** Diffusion profiles of three replicas are displayed for each system; three diffusion profiles labeled as 0, 1, 2 in 10-ns interval are displayed in each plot.

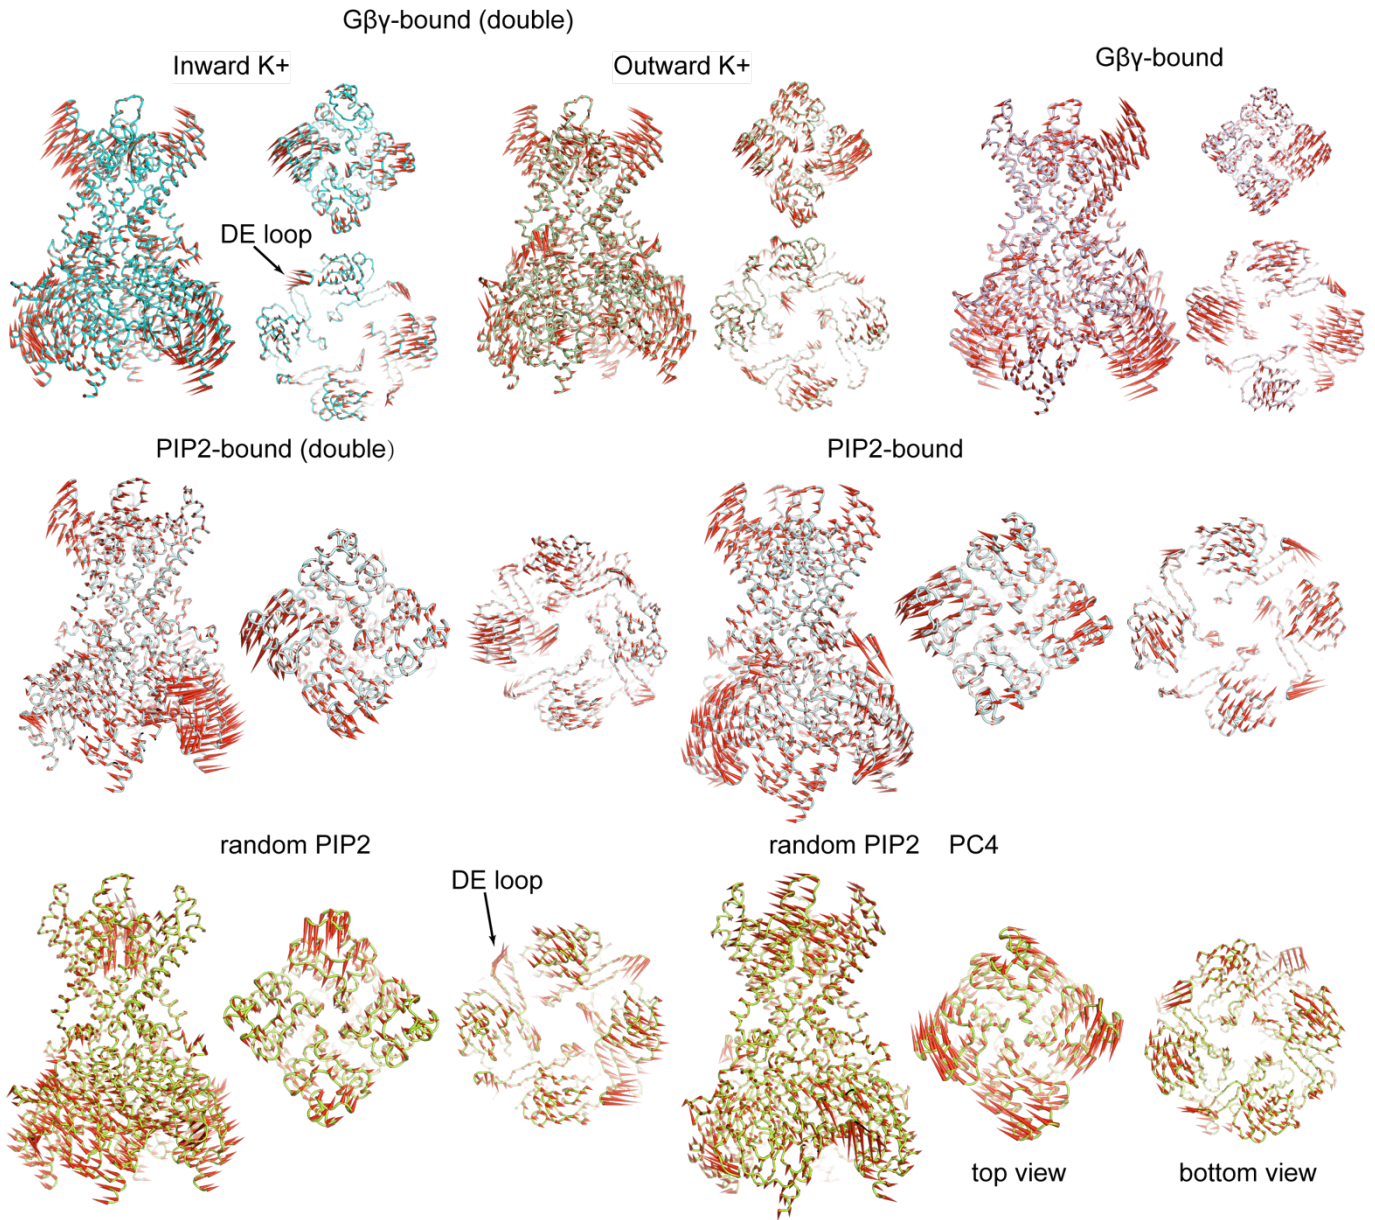

**Fig. S12 First principal modes (PC1s).** Side view, top view, and bottom view of PC1s of GIRK2 in  $G\beta\gamma$ -bound double bilayer systems for inward rectification and outward rectification of  $K^+$ ,  $G\beta\gamma$ -bound single bilayer,  $PIP_2$ -bound double bilayer and single bilayer, and random  $PIP_2$  systems. A clockwise rotation from top view of outer helices and bottom view in the CTDs (equivalent to anticlockwise rotation from top view of CTDs) was shown in PC4 of a random  $PIP_2$  replica, but not a dominant mode.

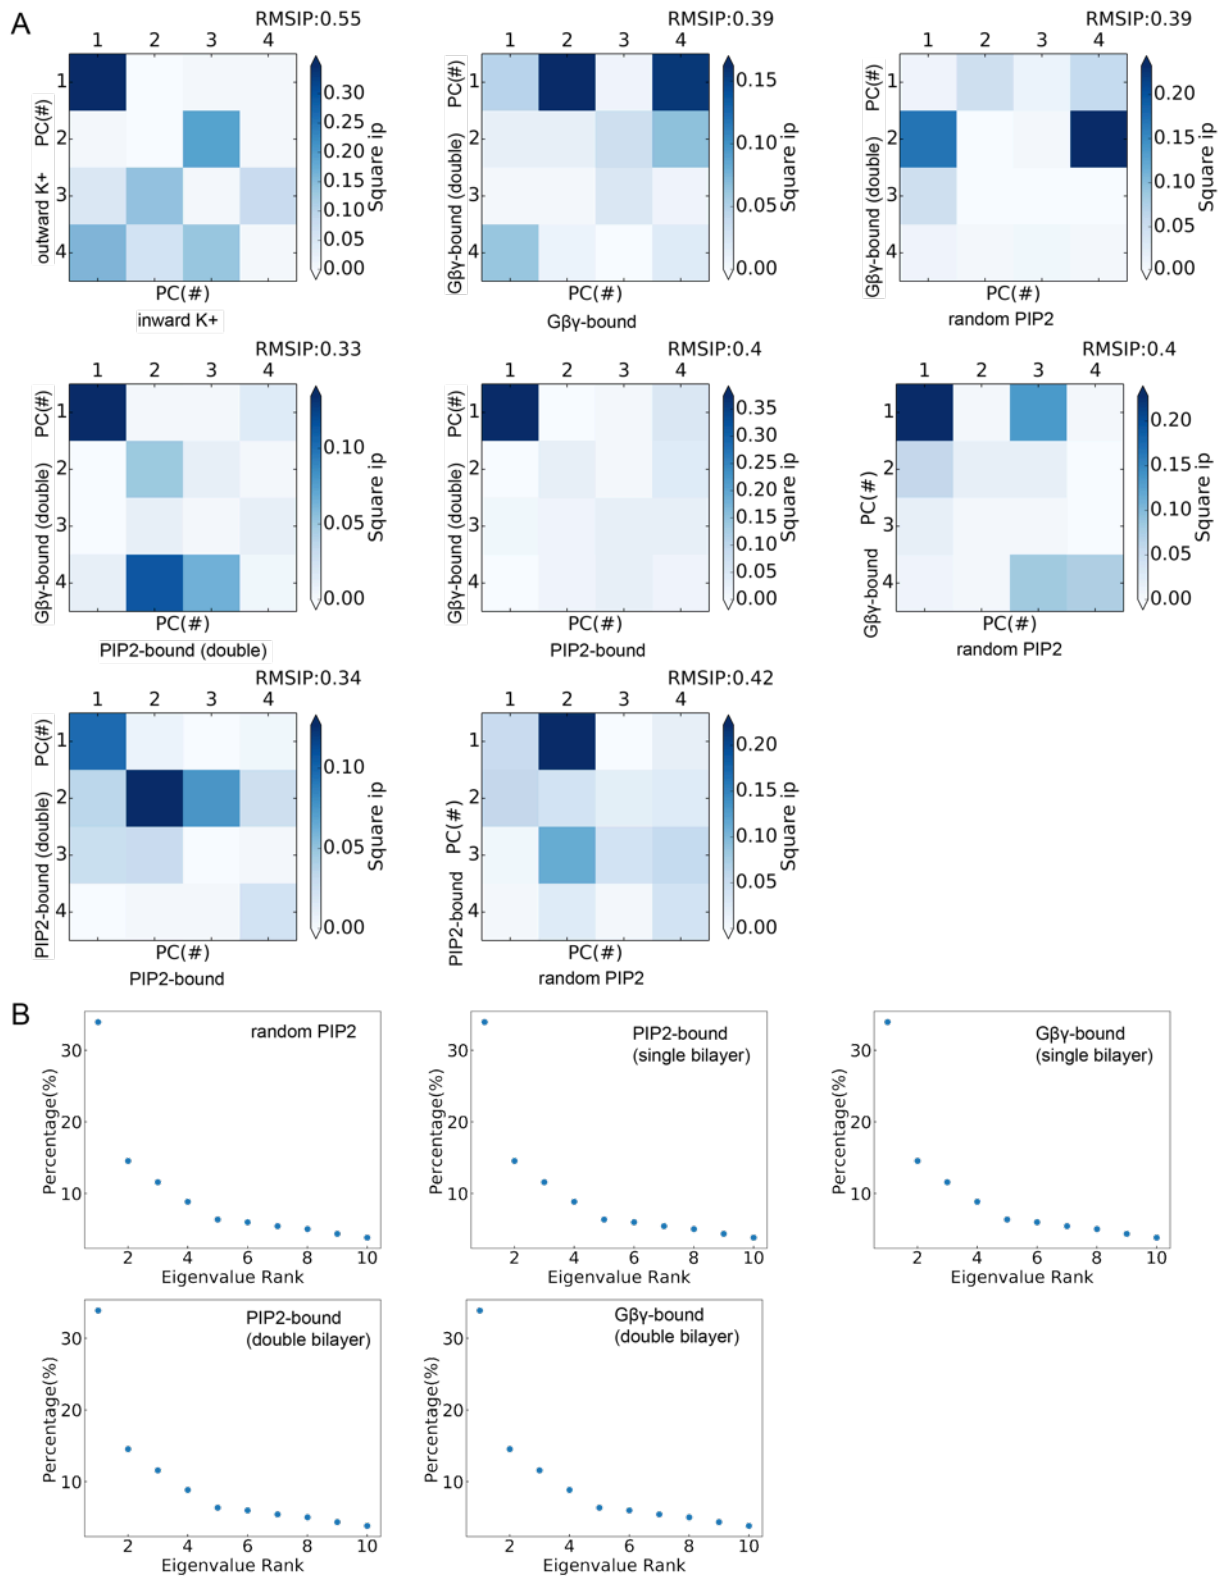

**Fig. S13 Root Mean Square Inner Product (RMSIP) and PCA projection percentage.** (A) RMSIP between two sets of modes obtained from MD trajectories of random PIP<sub>2</sub>, PIP<sub>2</sub>-bound, and Gβγ-bound single bilayer systems, PIP<sub>2</sub>-bound double bilayer system, and Gβγ-bound double bilayer systems with inward and outward K<sup>+</sup> currents. (B) PCA projection percentage plots for random PIP<sub>2</sub>, PIP<sub>2</sub>-bound, Gβγ-bound single bilayer systems, PIP<sub>2</sub>-bound and Gβγ-bound double bilayer systems.

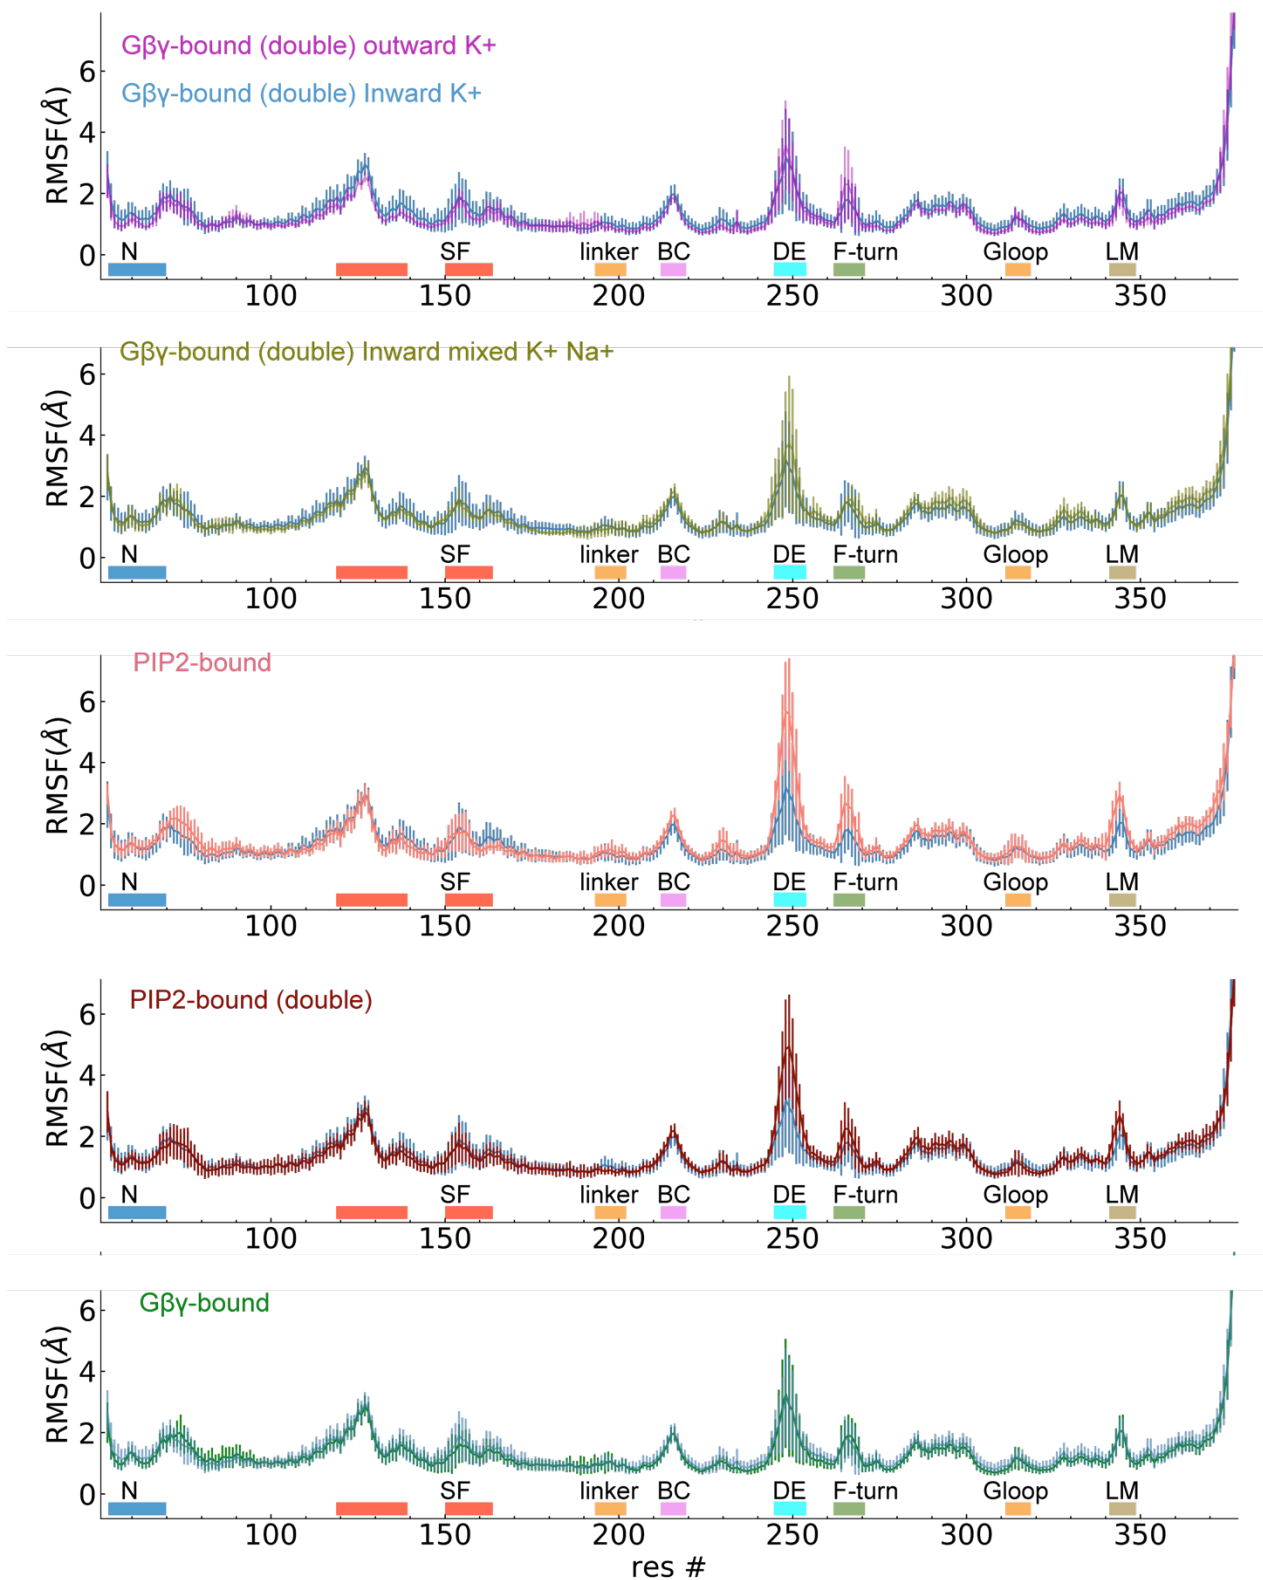

**Fig. S14 RMSF per residue of GIRK2** in Gβγ-bound double bilayer system for inward rectification of K<sup>+</sup> (in blue) in comparison with outward rectification of K<sup>+</sup> and inward rectification of mixed K<sup>+</sup> and Na<sup>+</sup>, PIP<sub>2</sub>-bound, PIP<sub>2</sub>-bound double bilayer, Gβγ-bound single bilayer, respectively. RMSF are displayed as averages with standard deviations as error bars.



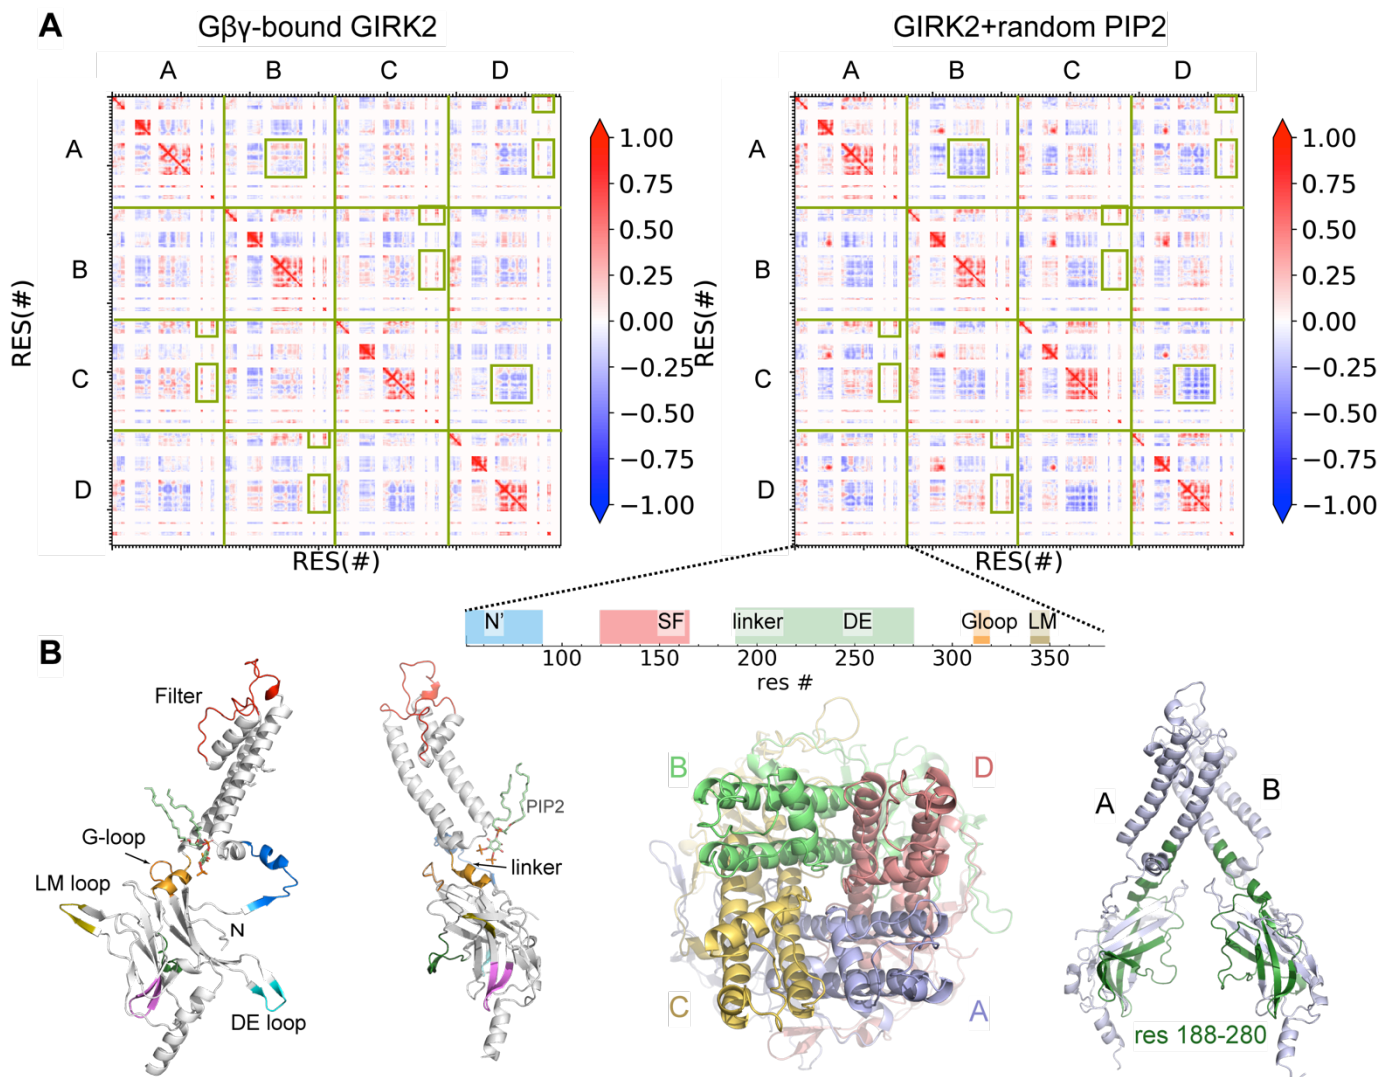

**Fig. S15 Dynamic cross correlation maps (DCCMs).** (A) DCCMs of random PIP<sub>2</sub> system and G $\beta\gamma$ -bound GIRK2 (+G $\beta\gamma$ ) systems with selected shown. (B) Illustration of DCCM sequences positions.

## Reference

1. H. Bernsteiner, E. M. Zangerl-Plessl, X. Chen and A. Stry-Weinzinger, *J. Gen. Physiol.*, 2019, **151**, 1231-1246.
2. D. Li, T. Jin, D. Gazgalis, M. Cui and D. E. Logothetis, *J. Biol. Chem.*, 2019, DOI: 10.1074/jbc.RA119.010047.
3. M. R. Whorton and R. MacKinnon, *Cell*, 2011, **147**, 199-208.
4. B. Hille, *Ion Channels of Excitable Membranes* Sinauer Associates Inc., Sunderland, MA U.S.A., 2001.
5. D. G. Levitt, *Annu. Rev. Biophys. Biophys. Chem.*, 1986, **15**, 29-57.
6. B. Roux and M. Karplus, *J. Phys. Chem.*, 1991, **95**, 4856-4868.
7. T. W. Allen, O. S. Andersen and B. Roux, *Biophys. Chem.*, 2006, **124**, 251-267.
8. T. W. Allen, O. S. Andersen and B. Roux, *Proceedings of the National Academy of Sciences*, 2004, **101**, 117.
9. G. Hummer, *New Journal of Physics*, 2005, **7**, 34-34.
10. T. B. Woolf and B. Roux, *JACS*, 1994, **116**, 5916-5926.
11. E. Awoonor-Williams and C. N. Rowley, *Biochimica et Biophysica Acta (BBA) - Biomembranes*, 2016, **1858**, 1672-1687.
12. K. Gaalswyk, E. Awoonor-Williams and C. N. Rowley, *J. Chem. Theory Comput.*, 2016, **12**, 5609-5619.
